# Supplementary material for: Multi-Omics Perspective Reveals the Different Patterns of Tumor Immune Microenvironment Based on Programmed Death Ligand 1 (PD-L1) Expression and Predictor of Responses to Immune Checkpoint Blockade across Pan-Cancer
Source: MDPI journal article supplement (doi:10.3390/ijms22105158), 2021-05-13
Supplement: s1 [file s1]

**Table S1.** The response rate to ICI immunotherapy among four subtypes.

| Cohorts     | Cancer type          | Drug                                          | No. of patients | Response rate | Type I<br>(R,<br>NR, %) | Type II<br>(R,<br>NR, %) | Type III<br>(R,<br>NR, %) | Type IV<br>(R, NR,<br>%) |
|-------------|----------------------|-----------------------------------------------|-----------------|---------------|-------------------------|--------------------------|---------------------------|--------------------------|
| Hugo        | melanoma             | anti-PD-1<br>(pembrolizumab<br>and nivolumab) | 26              | 50%           | 1, 0,<br>100%           | 4, 7,<br>36.36%          | 1, 1,<br>50%              | 7, 5,<br>58.33%          |
| Riaz        | melanoma             | anti-PD-1<br>(nivolumab)                      | 49              | 53.06%        | 3, 0,<br>100%           | 11, 11,<br>50%           | 1, 1,<br>50%              | 11, 11,<br>50%           |
| Miao        | ccRCC                | anti-PD-1<br>(nivolumab)                      | 33              | 60.6%         | 0, 1,<br>0%             | 9, 4,<br>69.23%          | 0, 3,<br>0%               | 11, 5,<br>68.75%         |
| Snyder      | urothelial<br>cancer | anti-PD-L1<br>(atezolizumab)                  | 25              | 36%           | 0, 0                    | 2, 7,<br>22.22%          | 1, 2,<br>33.33%           | 6, 7,<br>46.15%          |
| Mariathasan | urothelial<br>cancer | anti-PD-L1<br>(atezolizumab)                  | 298             | 22.82%        | 3, 5,<br>37.5%          | 21, 106,<br>16.54%       | 4, 18,<br>18.18%          | 40, 101,<br>28.37%       |

R: Responders; NR: Non-responders; %: Response rate.

**Table S2.** Statistical data of PD-L1 TPM, TIL (Z score) and subtypes proportion across pan-cancer.

| Cancer | PD-L1 TPM       |          | TIL (Z score) |          | Subtypes proportion (%) |         |          |         |           |
|--------|-----------------|----------|---------------|----------|-------------------------|---------|----------|---------|-----------|
|        | x±σ             | p value  | x±σ           | p value  | Type I                  | Type II | Type III | Type IV | p value   |
| UCS    | 1.1965±1.5641   |          | 2.5129±0.3234 |          | 0                       | 88.24   | 0        | 11.76   | <2.2e-16  |
| ACC    | 1.5098±4.0215   |          | 3.2289±0.5038 |          | 0                       | 31.58   | 1.32     | 67.11   | <2.2e-16  |
| LIHC   | 1.2585±1.7312   |          | 3.3436±0.3922 |          | 0                       | 15.87   | 0        | 84.13   | <2.2e-16  |
| LAML   | 1.4913±2.1768   |          | 2.7441±0.3582 |          | 0                       | 72.31   | 0.77     | 26.92   | <2.2e-16  |
| UVM    | 1.7863±1.901    |          | 3.2651±0.3378 |          | 0                       | 18.57   | 0        | 81.43   | <2.2e-16  |
| UCEC   | 2.0186±2.9133   |          | 2.9671±0.3904 |          | 0.41                    | 46.75   | 0.41     | 52.44   | <2.2e-16  |
| PRAD   | 1.5402±1.3266   |          | 3.117±0.2414  |          | 0.2                     | 25.56   | 0        | 74.24   | <2.2e-16  |
| LGG    | 2.5774±4.0419   |          | 2.7171±0.2654 |          | 0.63                    | 80.76   | 1.9      | 16.7    | <2.2e-16  |
| OV     | 2.2147±2.3987   |          | 2.7622±0.3614 |          | 0.29                    | 71.97   | 0        | 27.75   | <2.2e-16  |
| READ   | 2.7316±3.6447   |          | 3.1745±0.3236 |          | 0.89                    | 23.21   | 0.89     | 75      | <2.2e-16  |
| CHOL   | 4.1926±9.495    |          | 3.1718±0.411  |          | 0                       | 26.47   | 2.94     | 70.59   | <2.2e-16  |
| COAD   | 3.6617±6.3532   |          | 3.1834±0.3787 |          | 0.95                    | 23.17   | 1.9      | 73.97   | <2.2e-16  |
| SARC   | 5.5631±11.241   |          | 2.7278±0.2961 |          | 0.87                    | 71.43   | 8.23     | 19.48   | <2.2e-16  |
| SKCM   | 4.975±10.2462   |          | 3.2449±0.4173 |          | 5.33                    | 26.67   | 1.33     | 66.67   | <2.2e-16  |
| BLCA   | 9.3797±16.0506  |          | 3.038±0.3935  |          | 5.52                    | 33.13   | 12.88    | 48.47   | 6.466e-10 |
| BRCA   | 4.3186±5.3206   |          | 2.8286±0.2941 |          | 1.11                    | 64.78   | 2.53     | 31.58   | <2.2e-16  |
| PAAD   | 3.6685±2.6827   |          | 2.9688±0.3212 |          | 0                       | 48.59   | 1.41     | 50      | <2.2e-16  |
| KIRP   | 5.4884±7.6951   | <2.2e-16 | 3.1708±0.3268 | <2.2e-16 | 3.08                    | 18.85   | 5        | 73.08   | <2.2e-16  |
| STAD   | 8.3054±35.2599  |          | 3.0643±0.388  |          | 3.27                    | 32.73   | 4.36     | 59.64   | <2.2e-16  |
| MESO   | 10.293±19.6711  |          | 2.8601±0.321  |          | 2.9                     | 44.93   | 15.94    | 36.23   | 1.703e-09 |
| GBM    | 5.9626±6.9316   |          | 2.6967±0.295  |          | 0.76                    | 72.52   | 7.63     | 19.08   | <2.2e-16  |
| ESCA   | 6.3593±8.6932   |          | 2.9069±0.3929 |          | 1.61                    | 50      | 6.45     | 41.94   | 1.496e-15 |
| TGCT   | 6.3926±7.1982   |          | 2.5819±0.2161 |          | 0                       | 84.85   | 9.09     | 6.06    | <2.2e-16  |
| KIRC   | 6.0137±12.0815  |          | 3.1185±0.3061 |          | 1.38                    | 27.17   | 2.17     | 69.29   | <2.2e-16  |
| PCPG   | 6.2965±5.602    |          | 3.0592±0.2854 |          | 3.37                    | 32.02   | 3.37     | 61.24   | <2.2e-16  |
| KICH   | 12.264±30.428   |          | 3.3485±0.4434 |          | 7.94                    | 11.11   | 3.17     | 77.78   | <2.2e-16  |
| LUAD   | 13.2727±19.7916 |          | 2.7577±0.3256 |          | 1.41                    | 52.69   | 20.84    | 25.06   | 1.351e-11 |
| THCA   | 7.8647±5.5019   |          | 3.1534±0.2747 |          | 7.26                    | 18.35   | 3.43     | 70.97   | <2.2e-16  |
| CESC   | 15.4899±24.5242 |          | 3.0574±0.4021 |          | 13.5                    | 21.9    | 16.42    | 48.18   | 1.307e-06 |
| HNSC   | 14.1869±23.0509 |          | 2.9816±0.3232 |          | 9.68                    | 30.41   | 16.67    | 43.24   | 6.997e-06 |
| LUSC   | 19.5927±27.5279 |          | 2.5727±0.277  |          | 1.4                     | 57.94   | 31.78    | 8.88    | <2.2e-16  |
| DLBC   | 24.2074±33.5574 |          | 3.0615±0.4692 |          | 7.14                    | 4.76    | 30.95    | 57.14   | 1.682e-15 |
| THYM   | 32.8036±28.7492 |          | 3.1237±0.2366 |          | 55.26                   | 7.02    | 13.16    | 24.56   | 6.306e-12 |

Pan-cancer samples are divided into four groups based on PD-L1 expression and TIL Z score as follows:

type I , PD-L1 positive with TIL positive; type II, PD-L1 negative with TIL negative; type III, PD-L1

positive with TIL negative; and type IV, PD-L1 negative with TIL positive. Abbreviations: TPM, transcripts per million reads;  $\bar{x} \pm \sigma$ , mean  $\pm$  standard deviation; PD-L1, programmed death ligand 1; TIL, tumor infiltrating lymphocyte; UCS, uterine carcinosarcoma; ACC, adrenocortical carcinoma; LIHC, liver hepatocellular carcinoma; LAML, acute myeloid leukemia; UVM, uveal melanoma; UCEC, uterine corpus endometrial carcinoma; PRAD, prostate adenocarcinoma; LGG, brain lower grade glioma; OV, ovarian serous cystadenocarcinoma; READ, rectum adenocarcinoma; CHOL, cholangiocarcinoma; COAD, colon adenocarcinoma; SARC, sarcoma; SKCM, skin cutaneous melanoma; BLCA, bladder urothelial carcinoma; BRCA, breast invasive carcinoma; PAAD, pancreatic adenocarcinoma; KIRP, kidney renal papillary cell carcinoma; STAD, stomach adenocarcinoma; MESO, mesothelioma; GBM, glioblastoma multiforme; ESCA, esophageal carcinoma; TGCT, testicular germ cell tumors; KIRC, kidney renal clear cell carcinoma; PCPG, pheochromocytoma and paraganglioma; KICH, kidney chromophobe; LUAD, lung adenocarcinoma; THCA, thyroid carcinoma; CESC, cervical squamous cell carcinoma and endocervical adenocarcinoma; HNSC, head and neck squamous cell carcinoma; LUSC, lung squamous cell carcinoma; DLBC, lymphoid neoplasm diffuse large b-cell lymphoma; THYM, thymoma.

**Table S3.** Statistical data of 8 immune cell proportion across the four subtypes of tumor immune microenvironment.

| Immune cell types  | $\bar{x} \pm \sigma$ |               |               |               | p value  |
|--------------------|----------------------|---------------|---------------|---------------|----------|
|                    | Type I               | Type II       | Type III      | Type IV       |          |
| <b>T cells</b>     | 0.466±0.1833         | 0.2817±0.1255 | 0.3569±0.135  | 0.3582±0.134  | <2.2e-16 |
| <b>B cells</b>     | 0.0773±0.0831        | 0.0894±0.0944 | 0.0953±0.0912 | 0.0939±0.0963 | 0.0086   |
| <b>Macrophages</b> | 0.3067±0.1662        | 0.4638±0.1656 | 0.4054±0.1406 | 0.375±0.1508  | <2.2e-16 |
| <b>DC cells</b>    | 0.0622±0.0571        | 0.0372±0.0572 | 0.0497±0.0586 | 0.0452±0.0608 | <2.2e-16 |
| <b>NK cells</b>    | 0.0418±0.0374        | 0.0389±0.0357 | 0.0358±0.0297 | 0.0471±0.0384 | <2.2e-16 |
| <b>Mast cells</b>  | 0.0421±0.0409        | 0.0772±0.0736 | 0.0486±0.0413 | 0.0741±0.0661 | <2.2e-16 |
| <b>Eosinophils</b> | 0.0004±0.0026        | 0.0033±0.0196 | 0.001±0.005   | 0.0013±0.0079 | 4.2e-11  |
| <b>Neutrophils</b> | 0.0036±0.0084        | 0.0085±0.0222 | 0.0074±0.0179 | 0.0053±0.017  | 2.1e-13  |

Pan-cancer samples are divided into four groups based on PD-L1 expression and TIL Z score as follows:

type I, PD-L1 positive with TIL positive; type II, PD-L1 negative with TIL negative; type III, PD-L1 positive

with TIL negative; and type IV, PD-L1 negative with TIL positive. Abbreviations:  $\bar{x} \pm \sigma$ , mean  $\pm$  standard

deviation; DC cells, dendritic cells; NK cells, Natural killer cells.

**Table S4.** The relative proportion of 20 immune cell subtypes across the four subtypes of tumor

immune microenvironment.

| Immune cell subtypes         | Relative proportion (%) |         |          |         |
|------------------------------|-------------------------|---------|----------|---------|
|                              | Type I                  | Type II | Type III | Type IV |
| T cells CD8                  | 43.56                   | 27.44   | 39.43    | 33.81   |
| T cells CD4 naive            | 3.36                    | 1.68    | 0.4      | 1       |
| T cells CD4 memory resting   | 15.03                   | 41.49   | 24.86    | 36.15   |
| T cells CD4 memory activated | 10.3                    | 6.03    | 16.04    | 5.16    |
| T cells follicular helper    | 14.16                   | 11.15   | 9.88     | 10.05   |
| T cells gamma delta          | 1.48                    | 1.69    | 1.35     | 2.02    |
| T cells regulatory (Tregs)   | 12.11                   | 10.53   | 8.05     | 11.82   |
| B cells naive                | 50.81                   | 61.73   | 55.15    | 56.22   |
| B cells memory               | 7.46                    | 5.64    | 4.5      | 8.4     |
| Plasma cells                 | 41.73                   | 32.63   | 40.35    | 35.38   |
| Dendritic cells resting      | 71.93                   | 60.09   | 66.08    | 61.98   |
| Dendritic cells activated    | 28.07                   | 39.91   | 33.92    | 38.02   |
| NK cells resting             | 36.69                   | 36.63   | 50.24    | 25.44   |
| NK cells activated           | 63.31                   | 63.37   | 49.76    | 74.56   |
| Mast cells resting           | 79.7                    | 74.71   | 75.67    | 85.55   |
| Mast cells activated         | 20.3                    | 25.29   | 24.33    | 14.45   |
| Monocytes                    | 4.64                    | 12.59   | 5.21     | 7.05    |
| Macrophages M0               | 32.35                   | 35.68   | 36.48    | 33.81   |
| Macrophages M1               | 29.13                   | 11.86   | 22.44    | 17.28   |
| Macrophages M2               | 33.88                   | 39.88   | 35.87    | 41.86   |

Pan-cancer samples are divided into four groups based on PD-L1 expression and TIL Z score as follows:

type I, PD-L1 positive with TIL positive; type II, PD-L1 negative with TIL negative; type III, PD-L1

positive with TIL negative; and type IV, PD-L1 negative with TIL positive. The relative proportion

refers to the proportion of each immune cell subtype to the immune cell type which it belongs.

**Table S5.** Statistical data of the log2 value of TMB and the log2 value of Neoantigens across the four subtypes of tumor immune microenvironment.

| Genomic factors                | $\bar{x}\pm\sigma$ |               |               |               | p value  |
|--------------------------------|--------------------|---------------|---------------|---------------|----------|
|                                | Type I             | Type II       | Type III      | Type IV       |          |
| log <sub>2</sub> (TMB)         | 0.3404±2.1294      | 0.6836±1.9553 | 1.6336±1.9317 | 0.4576±1.8091 | <2.2e-16 |
| log <sub>2</sub> (Neoantigens) | 6.2054±2.1765      | 6.3903±1.9487 | 7.3379±1.7319 | 6.2546±1.7246 | <2.2e-16 |

Pan-cancer samples are divided into four groups based on PD-L1 expression and TIL Z score as follows:

type I, PD-L1 positive with TIL positive; type II, PD-L1 negative with TIL negative; type III, PD-L1 positive with TIL negative; and type IV, PD-L1 negative with TIL positive. Abbreviations: log<sub>2</sub>(TMB), the log<sub>2</sub> value of TMB; log<sub>2</sub>(Neoantigens), the log<sub>2</sub> value of neoantigens;  $\bar{x}\pm\sigma$ , mean  $\pm$  standard deviation.

**Table S6.** Mutation rate of the top ten genes across the four subtypes of tumor immune

microenvironment.

| Genes  | Mutation rate |         |          |         |
|--------|---------------|---------|----------|---------|
|        | Type I        | Type II | Type III | Type IV |
| TTN    | 29%           | 29%     | 46%      | 26%     |
| TP53   | 24%           | 41%     | 51%      | 29%     |
| MUC16  | 16%           | 18%     | 28%      | 16%     |
| PIK3CA | 14%           | 14%     | — —      | 12%     |
| BRAF   | 13%           | — —     | — —      | — —     |
| CSMD3  | 11%           | 13%     | 25%      | 9%      |
| LRP1B  | 10%           | 11%     | 23%      | 9%      |
| FAT1   | 10%           | — —     | — —      | — —     |
| GTF2I  | 10%           | — —     | — —      | — —     |
| PCLO   | 9%            | — —     | — —      | — —     |
| RYSR2  | 13%           | 13%     | 22%      | 9%      |
| SYNE1  | — —           | 12%     | — —      | 9%      |
| FLG    | — —           | 11%     | 17%      | — —     |
| USH2A  | — —           | 10%     | 23%      | — —     |
| ZFH4   | — —           | — —     | 20%      | — —     |
| SPTA1  | — —           | — —     | 17%      | — —     |
| APC    | — —           | — —     | — —      | 9%      |
| KMT2D  | — —           | — —     | — —      | 8%      |

Pan-cancer samples are divided into four groups based on PD-L1 expression and TIL Z score as follows:

type I, PD-L1 positive with TIL positive; type II, PD-L1 negative with TIL negative; type III, PD-L1

positive with TIL negative; and type IV, PD-L1 negative with TIL positive. Abbreviations: TTN, titin;

TP53, tumor protein 53; MUC16, mucin 16; PIK3CA, phosphatidylinositol-4,5-bisphosphate 3-kinase

catalytic subunit alpha; BRAF, B-Raf Proto-Oncogene; CSMD3, CUB and Sushi Multiple Domains 3;

LRP1B, LDL receptor related protein 1B; FAT1, FAT Atypical Cadherin 1; GTF2I, general transcription

factor Iii; PCLO, piccolo presynaptic cytomatrix protein; RYR2, ryanodine receptor 2; SYNE1, spectrin repeat containing nuclear envelope protein 1; FLG, filaggrin; USH2A, usherin; ZFHX4, zinc finger homeobox 4; SPTA1, spectrin alpha, erythrocytic 1; APC, adenomatous polyposis coli; KMT2D, lysine methyltransferase 2D.



**Table S7.** The drive gene detected of the four subtypes of tumor immune microenvironment.

| Drive genes |         |          |          |
|-------------|---------|----------|----------|
| Type I      | Type II | Type III | Type IV  |
| GTF2I       | --      | --       | --       |
| BRAF        | --      | --       | BRAF     |
| KRAS        | KRAS    | KRAS     | KRAS     |
| HRAS        | --      | --       | HRAS     |
| CDKN2A      | --      | --       | --       |
| MB21D2      | --      | --       | --       |
| PIK3CA      | --      | --       | --       |
| --          | IDH1    | --       | IDH1     |
| --          | NDUFA13 | --       | --       |
| --          | DGCR6L  | --       | --       |
| --          | S100A1  | --       | --       |
| --          | IAPP    | --       | --       |
| --          | --      | SLC3A2   | --       |
| --          | --      | KLF3     | --       |
| --          | --      | GNG12    | --       |
| --          | --      | NRAS     | NRAS     |
| --          | --      | RAB9B    | --       |
| --          | --      | --       | SH3BGRL2 |
| --          | --      | --       | TNP1     |
| --          | --      | --       | RPL22    |
| --          | --      | --       | MRPL22   |
| --          | --      | --       | CBLN3    |
| --          | --      | --       | PAIP2    |
| --          | --      | --       | SEC61B   |
| --          | --      | --       | DBI      |
| --          | --      | --       | GNA11    |
| --          | --      | --       | ARHGAP1  |
| --          | --      | --       | TVP23A   |

Pan-cancer samples are divided into four groups based on PD-L1 expression and TIL Z score as follows:

type I, PD-L1 positive with TIL positive; type II, PD-L1 negative with TIL negative; type III, PD-L1

positive with TIL negative; and type IV, PD-L1 negative with TIL positive. Drive genes is detected by a

function oncodrive from R package “maftools”, which is based on algorithm oncodriveCLUST which

was originally implemented in Python. Abbreviations: GTF2I, general transcription factor Iii; BRAF, B-

Raf Proto-Oncogene; KRAS, kirsten ras; HRAS, HRas proto-oncogene; CDKN2A, cyclin dependent kinase inhibitor 2A; MB21D2, Mab-21 domain containing 2; PIK3CA, phosphatidylinositol-4,5-bisphosphate 3-kinase catalytic subunit alpha; IDH1, isocitrate dehydrogenase (NADP(+)) 1; NDUFA13, NADH:ubiquinone oxidoreductase subunit A13; DGCR6L, DiGeorge syndrome critical region gene 6 like; S100A1, S100 calcium binding protein A1; IAPP, islet amyloid polypeptide; SLC3A2, solute carrier family 3 member 2; KLF3, Kruppel like factor 3; GNG12, G protein subunit gamma 12; NRAS, NRAS proto-oncogene; RAB9B, RAB9B, member RAS oncogene family; SH3BGRL2, SH3 domain binding glutamate rich protein like 2; TNP1, transition protein 1; RPL22, ribosomal protein L22; MRPL22, mitochondrial ribosomal protein L22; CBLN3, cerebellin 3 precursor; PAIP2, poly(A) binding protein interacting protein 2; SEC61B, SEC61 translocon subunit beta; DBI, diazepam binding inhibitor; GNA11, G protein subunit alpha 11; ARHGAP1, Rho GTPase activating protein 1; TVP23A, trans-golgi network vesicle protein 23 homolog A.

**Table S8.** Statistical data of 75 immune related genes across the four subtypes of tumor immune

microenvironment.

| Genes        | log10(TPM median + 1) |        |          |         | Amplification frequency |         |          |         | Deletion frequency |        |             |             |
|--------------|-----------------------|--------|----------|---------|-------------------------|---------|----------|---------|--------------------|--------|-------------|-------------|
|              | Type I                | Type   | Type III | Type IV | Type                    | Type II | Type III | Type IV | Type I             | Type   | Type III    | Type IV     |
|              |                       | II     |          |         | I                       |         |          |         |                    | II     |             | IV          |
| CD80         | 0.3203                | 0.2187 | 0.5281   | 0.1387  | -<br>0.0138             | 0.0101  | 0.0097   | -0.0098 | -<br>0.0019        | 0.0043 | 0.0160      | -<br>0.0062 |
| CD28         | 0.4961                | 0.3693 | 0.5735   | 0.2757  | -<br>0.0215             | 0.0081  | 0.0039   | -0.0066 | 0.0184             | 0.0005 | 0.0401      | -<br>0.0076 |
| ICOSLG       | 0.1018                | 0.1332 | 0.1294   | 0.1010  | -<br>0.0161             | 0.0093  | -0.0081  | -0.0063 | -<br>0.0081        | 0.0036 | 0.0033      | -<br>0.0033 |
| PDCD1L<br>G2 | 0.9779                | 0.6180 | 1.2218   | 0.4172  | 0.0632                  | -0.0060 | 0.1088   | -0.0147 | -<br>0.0290        | 0.0119 | -<br>0.0103 | -<br>0.0075 |
| CD274        | 1.3548                | 0.5686 | 1.4731   | 0.5148  | 0.0634                  | -0.0057 | 0.1073   | -0.0147 | -<br>0.0289        | 0.0120 | -<br>0.0102 | -<br>0.0077 |
| VTCN1        | 0.1741                | 0.5848 | 0.4184   | 0.2942  | -<br>0.0155             | 0.0078  | -0.0057  | -0.0054 | -<br>0.0068        | 0.0064 | 0.0290      | -<br>0.0097 |
| SLAMF7       | 1.0834                | 0.7382 | 1.3993   | 0.6645  | -<br>0.0145             | 0.0163  | 0.0104   | -0.0156 | -<br>0.0073        | 0.0015 | -<br>0.0005 | -<br>0.0009 |
| BTN3A2       | 1.5395                | 1.2574 | 1.4813   | 1.3310  | 0.0069                  | 0.0064  | -0.0001  | -0.0064 | -<br>0.0172        | 0.0063 | 0.0117      | -<br>0.0064 |
| BTN3A1       | 1.4734                | 1.2863 | 1.4860   | 1.2852  | 0.0071                  | 0.0066  | 0.0002   | -0.0067 | -<br>0.0172        | 0.0063 | 0.0117      | -<br>0.0064 |
| C10orf54     | 1.5927                | 1.4480 | 1.5955   | 1.3713  | -<br>0.0239             | 0.0087  | 0.0050   | -0.0071 | -<br>0.0070        | 0.0002 | 0.0045      | -<br>0.0004 |
| CD276        | 1.6237                | 1.8152 | 1.8457   | 1.6625  | -<br>0.0032             | 0.0037  | -0.0025  | -0.0029 | 0.0008             | 0.0036 | -<br>0.0102 | -<br>0.0019 |
| TNFSF9       | 0.8055                | 0.6094 | 1.0038   | 0.5845  | 0.0011                  | 0.0072  | 0.0004   | -0.0068 | -<br>0.0241        | 0.0105 | -<br>0.0135 | -<br>0.0061 |
| TNF          | 0.5080                | 0.4993 | 0.6486   | 0.3278  | 0.0102                  | 0.0005  | -0.0005  | -0.0011 | -<br>0.0183        | 0.0077 | 0.0176      | -<br>0.0084 |
| TNFSF4       | 0.5958                | 0.6049 | 0.7296   | 0.4572  | -<br>0.0182             | 0.0127  | -0.0079  | -0.0094 | 0.0013             | 0.0021 | -<br>0.0008 | -<br>0.0020 |
| IL1B         | 0.8064                | 0.7561 | 1.0571   | 0.5805  | -<br>0.0198             | 0.0071  | 0.0074   | -0.0063 | -<br>0.0052        | 0.0029 | -<br>0.0073 | -<br>0.0013 |
| CXCL9        | 1.9398                | 1.1779 | 2.0973   | 1.1652  | -<br>0.0148             | 0.0154  | 0.0081   | -0.0145 | -<br>0.0031        | 0.0028 | -<br>0.0035 | -<br>0.0019 |
| CXCL10       | 2.1239                | 1.4458 | 2.2517   | 1.4066  | -<br>0.0147             | 0.0153  | 0.0083   | -0.0144 | -<br>0.0031        | 0.0028 | -<br>0.0035 | -<br>0.0019 |
| CCL5         | 2.0905                | 1.5293 | 2.1492   | 1.5699  | -                       | 0.0025  | -0.0035  | -0.0012 | -                  | 0.0118 | -           | -           |

|          |        |        |        |        |        |        |         |         |        |        |        |        |
|----------|--------|--------|--------|--------|--------|--------|---------|---------|--------|--------|--------|--------|
|          |        |        |        |        | 0.0097 |        |         |         | 0.0247 |        | 0.0079 | 0.0081 |
| VEGFB    | 2.1423 | 2.2064 | 2.1531 | 2.1869 | 0.0025 | 0.0134 | 0.0021  | -0.0130 | -      | 0.0055 | -      | -      |
|          |        |        |        |        |        |        |         |         | 0.0109 |        | 0.0061 | 0.0035 |
| CX3CL1   | 1.5736 | 1.4184 | 1.6616 | 1.4120 | -      | 0.0019 | 0.0085  | -0.0025 | -      | 0.0072 | -      | -      |
|          |        |        |        |        | 0.0065 |        |         |         | 0.0015 |        | 0.0091 | 0.0052 |
| TGFB1    | 1.9251 | 1.8305 | 2.0088 | 1.6852 | -      | 0.0051 | 0.0346  | -0.0085 | -      | 0.0106 | 0.0127 | -      |
|          |        |        |        |        | 0.0179 |        |         |         | 0.0262 |        |        | 0.0098 |
| VEGFA    | 1.4662 | 1.4905 | 1.5972 | 1.4913 | -      | 0.0059 | 0.0030  | -0.0052 | -      | 0.0052 | -      | -      |
|          |        |        |        |        | 0.0109 |        |         |         | 0.0081 |        | 0.0031 | 0.0038 |
| CD70     | 0.5859 | 0.2989 | 0.6044 | 0.3016 | 0.0010 | 0.0070 | 0.0020  | -0.0069 | -      | 0.0111 | -      | -      |
|          |        |        |        |        |        |        |         |         | 0.0237 |        | 0.0131 | 0.0068 |
| CD40LG   | 0.4312 | 0.2399 | 0.3926 | 0.2615 | 0.0105 | 0.0041 | 0.0138  | -0.0066 | -      | 0.0066 | -      | -      |
|          |        |        |        |        |        |        |         |         | 0.0115 |        | 0.0031 | 0.0049 |
| IL10     | 0.3088 | 0.2937 | 0.4467 | 0.1616 | -      | 0.0105 | -0.0047 | -0.0076 | -      | 0.0055 | -      | -      |
|          |        |        |        |        | 0.0208 |        |         |         | 0.0044 |        | 0.0050 | 0.0040 |
| IFNG     | 0.4397 | 0.0956 | 0.5770 | 0.1034 | -      | 0.0126 | 0.0098  | -0.0113 | -      | 0.0039 | -      | -      |
|          |        |        |        |        | 0.0272 |        |         |         | 0.0053 |        | 0.0004 | 0.0032 |
| IL1A     | 0.1944 | 0.1882 | 0.6286 | 0.0934 | -      | 0.0068 | 0.0078  | -0.0061 | -      | 0.0026 | -      | -      |
|          |        |        |        |        | 0.0194 |        |         |         | 0.0054 |        | 0.0076 | 0.0010 |
| IL12A    | 0.1982 | 0.2505 | 0.3109 | 0.1409 | -      | 0.0084 | 0.0452  | -0.0135 | -      | 0.0040 | 0.0007 | -      |
|          |        |        |        |        | 0.0137 |        |         |         | 0.0041 |        |        | 0.0036 |
| IFNA2    | 0.0000 | 0.0000 | 0.0000 | 0.0000 | 0.0047 | 0.0029 | 0.0175  | -0.0055 | -      | 0.0184 | 0.0227 | -      |
|          |        |        |        |        |        |        |         |         | 0.0074 |        |        | 0.0198 |
| IFNA1    | 0.0000 | 0.0000 | 0.0000 | 0.0000 | 0.0048 | 0.0027 | 0.0193  | -0.0057 | -      | 0.0184 | 0.0241 | -      |
|          |        |        |        |        |        |        |         |         | 0.0094 |        |        | 0.0199 |
| IL4      | 0.0586 | 0.0509 | 0.0404 | 0.0450 | -      | 0.0008 | -0.0274 | 0.0036  | -      | 0.0036 | 0.0028 | -      |
|          |        |        |        |        | 0.0059 |        |         |         | 0.0119 |        |        | 0.0029 |
| IL2      | 0.0309 | 0.0000 | 0.0382 | 0.0167 | -      | 0.0054 | -0.0002 | -0.0049 | -      | 0.0050 | -      | -      |
|          |        |        |        |        | 0.0012 |        |         |         | 0.0098 |        | 0.0021 | 0.0037 |
| IL13     | 0.0217 | 0.0160 | 0.0238 | 0.0098 | -      | 0.0011 | -0.0276 | 0.0034  | -      | 0.0037 | 0.0029 | -      |
|          |        |        |        |        | 0.0061 |        |         |         | 0.0117 |        |        | 0.0030 |
| TNFRSF18 | 1.1031 | 0.8110 | 1.2711 | 0.7118 | -      | 0.0145 | 0.0041  | -0.0122 | -      | 0.0115 | 0.0048 | -      |
|          |        |        |        |        | 0.0263 |        |         |         | 0.0484 |        |        | 0.0081 |
| TIGIT    | 0.6805 | 0.3483 | 0.8267 | 0.3037 | -      | 0.0102 | 0.0116  | -0.0099 | -      | 0.0032 | 0.0102 | -      |
|          |        |        |        |        | 0.0187 |        |         |         | 0.0009 |        |        | 0.0044 |
| PDCD1    | 0.9511 | 0.4209 | 0.9007 | 0.4105 | -      | 0.0089 | -0.0028 | -0.0065 | 0.0285 | 0.0098 | 0.0596 | -      |
|          |        |        |        |        | 0.0182 |        |         |         |        |        |        | 0.0197 |
| CTLA4    | 0.7928 | 0.4011 | 0.9165 | 0.3619 | -      | 0.0080 | 0.0041  | -0.0066 | 0.0180 | 0.0010 | 0.0397 | -      |
|          |        |        |        |        | 0.0213 |        |         |         |        |        |        | 0.0080 |
| IL2RA    | 0.7189 | 0.5409 | 1.0712 | 0.3913 | -      | 0.0131 | -0.0080 | -0.0105 | 0.0032 | 0.0025 | 0.0008 | -      |
|          |        |        |        |        | 0.0083 |        |         |         |        |        |        | 0.0027 |
| TNFRSF4  | 0.9307 | 0.7939 | 0.9990 | 0.7702 | -      | 0.0145 | 0.0041  | -0.0122 | -      | 0.0115 | 0.0048 | -      |
|          |        |        |        |        | 0.0263 |        |         |         | 0.0484 |        |        | 0.0081 |
| CD27     | 1.2473 | 0.7632 | 1.2527 | 0.7593 | -      | 0.0163 | 0.0054  | -0.0144 | -      | 0.0038 | 0.0067 | -      |

|              |        |        |        |        |             |        |         |         |             |        |             |             |
|--------------|--------|--------|--------|--------|-------------|--------|---------|---------|-------------|--------|-------------|-------------|
|              |        |        |        |        | 0.0210      |        |         |         | 0.0185      |        | 0.0032      |             |
| LAG3         | 1.0336 | 0.6141 | 1.1296 | 0.5641 | -<br>0.0167 | 0.0159 | 0.0061  | -0.0145 | -<br>0.0241 | 0.0029 | 0.0082      | -<br>0.0022 |
| TNFRSF9      | 0.4974 | 0.2787 | 0.6772 | 0.2172 | -<br>0.0276 | 0.0125 | 0.0047  | -0.0104 | -<br>0.0492 | 0.0112 | 0.0038      | -<br>0.0075 |
| ICOS         | 0.7432 | 0.2714 | 0.7143 | 0.2374 | -<br>0.0209 | 0.0076 | 0.0044  | -0.0062 | 0.0178      | 0.0016 | 0.0395      | -<br>0.0084 |
| BTLA         | 0.2973 | 0.1416 | 0.3076 | 0.1121 | -<br>0.0170 | 0.0103 | 0.0099  | -0.0099 | -<br>0.0033 | 0.0006 | 0.0131      | -<br>0.0023 |
| KIR2DL3      | 0.0348 | 0.0119 | 0.0358 | 0.0138 | -<br>0.0120 | 0.0075 | 0.0245  | -0.0097 | -<br>0.0218 | 0.0137 | 0.0083      | -<br>0.0124 |
| KIR2DL1      | 0.0323 | 0.0152 | 0.0376 | 0.0161 | -<br>0.0120 | 0.0075 | 0.0245  | -0.0097 | -<br>0.0218 | 0.0137 | 0.0083      | -<br>0.0124 |
| TNFRSF1<br>4 | 1.5573 | 1.3036 | 1.4711 | 1.4984 | -<br>0.0263 | 0.0145 | 0.0041  | -0.0122 | -<br>0.0484 | 0.0115 | 0.0048      | -<br>0.0081 |
| EDNRB        | 0.7013 | 0.8715 | 0.7557 | 0.9276 | 0.0052      | 0.0089 | -0.0117 | -0.0069 | -<br>0.0172 | 0.0033 | -<br>0.0093 | -<br>0.0006 |
| CD40         | 1.6639 | 1.2526 | 1.7019 | 1.3159 | -<br>0.0211 | 0.0090 | -0.0163 | -0.0045 | -<br>0.0164 | 0.0042 | 0.0092      | -<br>0.0041 |
| ADORA2<br>A  | 0.0857 | 0.0805 | 0.0930 | 0.0565 | -<br>0.0063 | 0.0155 | 0.0078  | -0.0151 | -<br>0.0056 | 0.0015 | 0.0026      | -<br>0.0013 |
| TLR4         | 0.7458 | 0.9877 | 1.0592 | 0.7817 | -<br>0.0059 | 0.0081 | 0.0002  | -0.0072 | -<br>0.0035 | 0.0035 | -<br>0.0022 | -<br>0.0027 |
| HAVCR2       | 1.1448 | 1.1057 | 1.3836 | 0.8393 | -<br>0.0187 | 0.0038 | -0.0315 | 0.0023  | -<br>0.0098 | 0.0057 | 0.0051      | -<br>0.0054 |
| ITGB2        | 1.7275 | 1.5556 | 1.8711 | 1.3055 | -<br>0.0146 | 0.0081 | -0.0066 | -0.0056 | -<br>0.0100 | 0.0034 | 0.0031      | -<br>0.0029 |
| ICAM1        | 1.8762 | 1.5580 | 2.0402 | 1.4881 | -<br>0.0173 | 0.0107 | -0.0060 | -0.0079 | -<br>0.0084 | 0.0069 | -<br>0.0058 | -<br>0.0050 |
| SELP         | 0.5683 | 0.5351 | 0.6488 | 0.5996 | -<br>0.0233 | 0.0112 | -0.0026 | -0.0084 | 0.0033      | 0.0017 | 0.0011      | -<br>0.0020 |
| HLA-<br>DRB5 | 2.6365 | 2.1681 | 2.5815 | 2.1948 | 0.0102      | 0.0005 | -0.0005 | -0.0011 | -<br>0.0183 | 0.0077 | 0.0176      | -<br>0.0084 |
| HLA-<br>DQA1 | 1.8627 | 1.4800 | 1.9484 | 1.3870 | 0.0102      | 0.0005 | -0.0005 | -0.0011 | -<br>0.0183 | 0.0077 | 0.0176      | -<br>0.0084 |
| HLA-<br>DQB1 | 2.2295 | 1.6782 | 2.0907 | 1.6972 | 0.0102      | 0.0005 | -0.0005 | -0.0011 | -<br>0.0183 | 0.0077 | 0.0176      | -<br>0.0084 |
| MICA         | 1.3878 | 1.3270 | 1.3968 | 1.3667 | 0.0102      | 0.0005 | -0.0005 | -0.0011 | -<br>0.0183 | 0.0077 | 0.0176      | -<br>0.0084 |
| MICB         | 1.0693 | 0.8610 | 1.2010 | 0.7497 | 0.0102      | 0.0005 | -0.0005 | -0.0011 | -<br>0.0183 | 0.0077 | 0.0176      | -<br>0.0084 |
| HLA-<br>DQA2 | 1.7196 | 1.2854 | 1.7498 | 1.2424 | 0.0102      | 0.0005 | -0.0005 | -0.0011 | -<br>0.0183 | 0.0077 | 0.0176      | -<br>0.0084 |
| HLA-         | 1.6699 | 1.0870 | 1.5824 | 1.1016 | 0.0102      | 0.0005 | -0.0005 | -0.0011 | -           | 0.0077 | 0.0176      | -           |

|                 |        |        |        |        |        |        |         |         |        |        |        |        |
|-----------------|--------|--------|--------|--------|--------|--------|---------|---------|--------|--------|--------|--------|
| <b>DQB2</b>     |        |        |        |        |        |        |         |         |        | 0.0183 |        | 0.0084 |
| <b>HLA-B</b>    | 3.5472 | 2.9744 | 3.3752 | 3.2447 | 0.0102 | 0.0005 | -0.0005 | -0.0011 | -      | 0.0077 | 0.0176 | -      |
|                 |        |        |        |        |        |        |         |         | 0.0183 |        |        | 0.0084 |
| <b>HLA-A</b>    | 3.4341 | 2.8875 | 3.2356 | 3.1685 | 0.0072 | 0.0025 | -0.0100 | -0.0014 | -      | 0.0079 | 0.0227 | -      |
|                 |        |        |        |        |        |        |         |         | 0.0112 |        |        | 0.0099 |
| <b>HLA-C</b>    | 3.3619 | 2.9029 | 3.2004 | 3.1143 | 0.0102 | 0.0005 | -0.0005 | -0.0011 | -      | 0.0077 | 0.0176 | -      |
|                 |        |        |        |        |        |        |         |         | 0.0183 |        |        | 0.0084 |
| <b>HLA-DRA</b>  | 3.3900 | 3.0198 | 3.4367 | 2.9671 | 0.0102 | 0.0005 | -0.0005 | -0.0011 | -      | 0.0077 | 0.0176 | -      |
|                 |        |        |        |        |        |        |         |         | 0.0183 |        |        | 0.0084 |
| <b>HLA-DRB1</b> | 3.1861 | 2.7301 | 3.1601 | 2.7442 | 0.0102 | 0.0005 | -0.0005 | -0.0011 | -      | 0.0077 | 0.0176 | -      |
|                 |        |        |        |        |        |        |         |         | 0.0183 |        |        | 0.0084 |
| <b>HLA-DPB1</b> | 2.6109 | 2.1965 | 2.5544 | 2.1987 | 0.0116 | 0.0002 | -0.0107 | 0.0005  | -      | 0.0077 | 0.0125 | -      |
|                 |        |        |        |        |        |        |         |         | 0.0183 |        |        | 0.0076 |
| <b>HLA-DPA1</b> | 2.3150 | 1.9591 | 2.3219 | 1.9226 | 0.0116 | 0.0002 | -0.0107 | 0.0005  | -      | 0.0080 | 0.0122 | -      |
|                 |        |        |        |        |        |        |         |         | 0.0185 |        |        | 0.0079 |
| <b>IDO1</b>     | 1.3350 | 0.7901 | 1.5796 | 0.7838 | -      | 0.0247 | 0.0358  | -0.0255 | -      | 0.0044 | -      | -      |
|                 |        |        |        |        | 0.0385 |        |         |         | 0.0173 |        | 0.0076 | 0.0018 |
| <b>GZMA</b>     | 1.6443 | 1.0393 | 1.6682 | 1.0802 | -      | 0.0042 | 0.0024  | -0.0037 | -      | 0.0057 | -      | -      |
|                 |        |        |        |        | 0.0074 |        |         |         | 0.0207 |        | 0.0099 | 0.0024 |
| <b>PRF1</b>     | 1.3762 | 0.8006 | 1.3650 | 0.8106 | -      | 0.0082 | 0.0057  | -0.0071 | -      | 0.0019 | 0.0014 | -      |
|                 |        |        |        |        | 0.0198 |        |         |         | 0.0067 |        |        | 0.0015 |
| <b>ARG1</b>     | 0.0855 | 0.1031 | 0.0873 | 0.0949 | 0.0000 | 0.0094 | 0.0007  | -0.0088 | -      | 0.0055 | -      | -      |
|                 |        |        |        |        |        |        |         |         | 0.0227 |        | 0.0094 | 0.0021 |
| <b>HMGB1</b>    | 1.9774 | 1.9661 | 1.9417 | 1.8891 | -      | 0.0104 | 0.0012  | -0.0086 | -      | -      | 0.0111 | 0.0016 |
|                 |        |        |        |        | 0.0168 |        |         |         | 0.0147 | 0.0024 |        |        |
| <b>ENTPD1</b>   | 0.9890 | 1.0906 | 1.1167 | 0.9566 | -      | 0.0054 | 0.0040  | -0.0047 | -      | 0.0038 | 0.0071 | -      |
|                 |        |        |        |        | 0.0131 |        |         |         | 0.0085 |        |        | 0.0040 |

Pan-cancer samples are divided into four groups based on PD-L1 expression and TIL Z score as follows:

type I, PD-L1 positive with TIL positive; type II, PD-L1 negative with TIL negative; type III, PD-L1

positive with TIL negative; and type IV, PD-L1 negative with TIL positive. Amplification frequency (the

difference between the fraction of samples in which an immune gene is amplified in a particular

subtype and the amplification fraction in all samples); and the deletion frequency (as amplifications) for

75 immune genes by immune subtype. Abbreviations: log10(TPM median + 1), the log10 value of the

median of TPM plus one.

**Table S9.** The pathway scores of the shared pathways across the four subtypes of tumor immune microenvironment.

| Pathway                                      | Pathway score |         |          |         |
|----------------------------------------------|---------------|---------|----------|---------|
|                                              | Type I        | Type II | Type III | Type IV |
| Complement and coagulation cascades          | 0.3925        | 0.0856  | 0.3512   | 0.1707  |
| Retinol metabolism                           | 0.3493        | 0.0733  | 0.3868   | 0.1906  |
| Drug metabolism - cytochrome P450            | 0.3646        | 0.0661  | 0.3819   | 0.1874  |
| Metabolism of xenobiotics by cytochrome P450 | 0.3763        | 0.0613  | 0.3882   | 0.1742  |
| Chemical carcinogenesis                      | 0.3823        | 0.0681  | 0.3812   | 0.1684  |
| Steroid hormone biosynthesis                 | 0.3608        | 0.0637  | 0.4422   | 0.1332  |
| Drug metabolism - other enzymes              | 0.3890        | 0.0582  | 0.4255   | 0.1274  |
| Ascorbate and aldarate metabolism            | 0.3562        | 0.0846  | 0.4158   | 0.1434  |
| Glucuronate pathway                          | 0.4071        | 0.0593  | 0.4037   | 0.1299  |
| Pentose and glucuronate interconversions     | 0.4071        | 0.0593  | 0.4037   | 0.1299  |
| Porphyrin and chlorophyll metabolism         | 0.4071        | 0.0593  | 0.4037   | 0.1299  |
| Fat digestion and absorption                 | 0.3525        | 0.0435  | 0.4726   | 0.1314  |
| Vitamin digestion and absorption             | 0.3877        | 0.0480  | 0.4859   | 0.0784  |
| Bile secretion                               | 0.4251        | 0.1051  | 0.3327   | 0.1370  |
| Pancreatic secretion                         | 0.3708        | 0.1056  | 0.4237   | 0.0999  |
| Protein digestion and absorption             | 0.3598        | 0.1167  | 0.4335   | 0.0901  |
| Tyrosine metabolism                          | 0.2231        | 0.0611  | 0.5195   | 0.1964  |
| Glycolysis / Gluconeogenesis                 | 0.3381        | 0.0856  | 0.4206   | 0.1557  |
| Fatty acid degradation                       | 0.3016        | 0.1124  | 0.4034   | 0.1825  |
| Primary bile acid biosynthesis               | 0.3489        | 0.1102  | 0.3517   | 0.1891  |
| PPAR signaling pathway                       | 0.4308        | 0.0769  | 0.3531   | 0.1392  |
| Bile acid biosynthesis, cholesterol          | 0.3480        | 0.1046  | 0.3550   | 0.1924  |
| Linoleic acid metabolism                     | 0.2511        | 0.0965  | 0.5003   | 0.1521  |
| Arachidonic acid metabolism                  | 0.2808        | 0.0708  | 0.5192   | 0.1291  |

Pan-cancer samples are divided into four groups based on PD-L1 expression and TIL Z score as follows:

type I, PD-L1 positive with TIL positive; type II, PD-L1 negative with TIL negative; type III, PD-L1

positive with TIL negative; and type IV, PD-L1 negative with TIL positive.

**Table S10.** Statistical data of the specific gene TPM across the four subtypes of tumor immune microenvironment.

| Genes | $\bar{x} \pm \sigma$ |                 |                  |                  | p value  |
|-------|----------------------|-----------------|------------------|------------------|----------|
|       | Type I               | Type II         | Type III         | Type IV          |          |
| IFNG  | 3.6821±4.9707        | 0.9872±2.8601   | 6.2627±12.3615   | 0.9642±2.0909    | <2.2e-16 |
| TNF   | 5.5755±12.5646       | 5.4704±11.8647  | 8.8042±20.2282   | 3.2863±8.2091    | <2.2e-16 |
| IL12A | 1.3549±3.1969        | 1.8349±3.391    | 1.8474±2.7986    | 1.0006±2.2759    | <2.2e-16 |
| IL12B | 0.6232±1.457         | 0.4756±4.2685   | 1.1769±6.6174    | 0.2447±0.904     | <2.2e-16 |
| VEGFA | 47.1882±75.8538      | 59.906±112.5433 | 55.4688±60.8448  | 68.5698±118.2574 | 1.2e-07  |
| TGFB1 | 94.7305±54.7422      | 85.5343±71.2495 | 118.3545±83.4194 | 64.2295±60.054   | <2.2e-16 |
| IL6   | 13.8718±93.1519      | 9.7069±34.4149  | 23.8079±50.4288  | 5.3844±17.4216   | <2.2e-16 |
| IL10  | 1.7147±2.772         | 1.8251±8.8754   | 4.2433±15.7911   | 0.8615±1.6081    | <2.2e-16 |
| GZMB  | 40.2642±49.1587      | 12.0498±25.8512 | 57.189±96.4566   | 13.1238±53.808   | <2.2e-16 |
| PRF1  | 29.1039±28.8787      | 10.8678±19.7757 | 38.2342±53.6238  | 11.1715±17.645   | <2.2e-16 |

Pan-cancer samples are divided into four groups based on PD-L1 expression and TIL Z score as follows:

type I, PD-L1 positive with TIL positive; type II, PD-L1 negative with TIL negative; type III, PD-L1

positive with TIL negative; and type IV, PD-L1 negative with TIL positive.

Abbreviations:  $\bar{x} \pm \sigma$ , mean  $\pm$  standard deviation; IFNG, interferon gamma; TNF, tumor necrosis factor;

IL12A, interleukin 12A; IL12B, interleukin 12B; VEGFA, vascular endothelial growth factor A; TGFB1,

transforming growth factor beta 1; IL6, interleukin 6; IL10, interleukin 10; GZMB, granzyme B; PRF1,

perforin-1.



**Table S11.** Statistical data of 8 immune cell proportion across the four subtypes of tumor immune microenvironment in validation cohort from the Gene Expression Omnibus database.

| Immune cell types  | $\bar{x} \pm \sigma$ |               |               |               | p value  |
|--------------------|----------------------|---------------|---------------|---------------|----------|
|                    | Type I               | Type II       | Type III      | Type IV       |          |
| <b>T cells</b>     | 0.4328±0.0731        | 0.2641±0.0847 | 0.3544±0.0943 | 0.3294±0.0983 | <2.2e-16 |
| <b>B cells</b>     | 0.0429±0.0349        | 0.0194±0.0226 | 0.0237±0.0335 | 0.0258±0.0283 | <2.2e-16 |
| <b>Macrophages</b> | 0.4095±0.0957        | 0.547±0.1239  | 0.5032±0.1145 | 0.4897±0.1215 | <2.2e-16 |
| <b>DC cells</b>    | 0.0105±0.0168        | 0.0101±0.0154 | 0.0117±0.0201 | 0.0111±0.0165 | 0.31     |
| <b>NK cells</b>    | 0.0596±0.0251        | 0.0387±0.0223 | 0.0493±0.0274 | 0.0459±0.0228 | <2.2e-16 |
| <b>Mast cells</b>  | 0.0419±0.0286        | 0.1179±0.0726 | 0.0546±0.0521 | 0.0966±0.0619 | <2.2e-16 |
| <b>Eosinophils</b> | 0.0±0.0              | 0.0±0.0006    | 0.0±0.0       | 0.0±0.0005    | 0.6      |
| <b>Neutrophils</b> | 0.0028±0.0153        | 0.0029±0.0094 | 0.003±0.0074  | 0.0015±0.0043 | 1.9e-05  |

Breast cancer samples are divided into four groups based on PD-L1 expression and TIL Z score as follows:

type I, PD-L1 positive with TIL positive; type II, PD-L1 negative with TIL negative; type III, PD-L1 positive

with TIL negative; and type IV, PD-L1 negative with TIL positive. Abbreviations:  $\bar{x} \pm \sigma$ , mean  $\pm$  standard

deviation; DC cells, dendritic cells; NK cells, Natural killer cells.

**Table S12.** The relative proportion of 20 Immune cell subtypes across the four subtypes of tumor

immune microenvironment in validation cohort from the Gene Expression Omnibus database.

| Immune cell subtypes         | Relative proportion |          |          |          |
|------------------------------|---------------------|----------|----------|----------|
|                              | Type I              | Type II  | Type III | Type IV  |
| T cells CD8                  | 37.8199             | 29.39244 | 34.82628 | 31.9061  |
| T cells CD4 naive            | 0                   | 0.005558 | 0        | 0.000943 |
| T cells CD4 memory resting   | 43.69211            | 57.3395  | 48.31294 | 55.24973 |
| T cells CD4 memory activated | 2.000126            | 0.071391 | 1.097853 | 0.237152 |
| T cells follicular helper    | 7.59751             | 7.240071 | 7.87873  | 5.852387 |
| T cells gamma delta          | 0.448493            | 0.073389 | 0.466406 | 0.11765  |
| T cells regulatory (Tregs)   | 8.441861            | 5.87765  | 7.417789 | 6.636037 |
| B cells naive                | 74.06252            | 74.56335 | 72.51838 | 76.04757 |
| B cells memory               | 23.2216             | 16.94169 | 20.77287 | 16.53687 |
| Plasma cells                 | 2.715881            | 8.494962 | 6.708746 | 7.41556  |
| Dendritic cells resting      | 79.86451            | 90.80358 | 78.48169 | 90.61175 |
| Dendritic cells activated    | 20.13549            | 9.196421 | 21.51831 | 9.388251 |
| NK cells resting             | 0.085976            | 5.476928 | 0.98342  | 1.449035 |
| NK cells activated           | 99.91402            | 94.52307 | 99.01658 | 98.55096 |
| Mast cells resting           | 97.19886            | 93.85222 | 92.07631 | 95.20349 |
| Mast cells activated         | 2.801139            | 6.147775 | 7.92369  | 4.796508 |
| Monocytes                    | 5.567441            | 5.912497 | 6.076638 | 6.1949   |
| Macrophages M0               | 21.96947            | 20.33371 | 24.84728 | 17.62694 |
| Macrophages M1               | 24.55563            | 9.010947 | 16.52947 | 13.72083 |
| Macrophages M2               | 47.90746            | 64.74284 | 52.5466  | 62.45733 |

Breast cancer samples are divided into four groups based on PD-L1 expression and TIL Z score as

follows: type I, PD-L1 positive with TIL positive; type II, PD-L1 negative with TIL negative; type III, PD-

L1 positive with TIL negative; and type IV, PD-L1 negative with TIL positive. The relative proportion

refers to the proportion of each immune cell subtype to the immune cell type which it belongs.

**Table S13.** Statistical data of the specific gene TPM across the four subtypes of tumor immune

microenvironment in validation cohort from the Gene Expression Omnibus database.

| Genes | $\bar{x} \pm \sigma$ |                 |                 |                 | p value  |
|-------|----------------------|-----------------|-----------------|-----------------|----------|
|       | Type I               | Type II         | Type III        | Type IV         |          |
| IFNG  | 1.3761±1.1004        | 0.172±0.1604    | 1.197±1.2829    | 0.155±0.1951    | <2.2e-16 |
| TNF   | 2.0154±2.2279        | 0.779±1.0797    | 2.2545±2.9247   | 0.5041±0.6719   | <2.2e-16 |
| IL12A | 0.4873±0.6421        | 0.272±0.3575    | 0.6166±0.5665   | 0.1731±0.2657   | <2.2e-16 |
| IL12B | 0.3923±0.296         | 0.1322±0.0892   | 0.3798±0.3122   | 0.0976±0.0867   | <2.2e-16 |
| VEGFA | 23.6823±37.3677      | 23.1697±20.3401 | 37.5709±32.1312 | 10.9173±12.1465 | <2.2e-16 |
| TGFB1 | 35.7903±15.8189      | 36.8513±22.7435 | 57.1662±29.7121 | 20.2818±13.3514 | <2.2e-16 |
| IL6   | 2.2228±6.7072        | 1.515±2.9958    | 4.6579±12.2949  | 0.8278±2.169    | <2.2e-16 |
| IL10  | 0.8486±0.47          | 0.4593±0.3801   | 1.204±1.4405    | 0.2791±0.2449   | <2.2e-16 |
| GZMB  | 19.6877±12.8835      | 1.8425±3.0091   | 17.652±16.3429  | 2.2164±3.7294   | <2.2e-16 |
| PRF1  | 8.5772±5.4426        | 1.3393±1.1831   | 7.9223±6.4884   | 1.2897±1.3609   | <2.2e-16 |

Breast cancer samples are divided into four groups based on PD-L1 expression and TIL Z score as

follows: type I, PD-L1 positive with TIL positive; type II, PD-L1 negative with TIL negative; type III, PD-

L1 positive with TIL negative; and type IV, PD-L1 negative with TIL positive.

Abbreviations:  $\bar{x} \pm \sigma$ , mean  $\pm$  standard deviation; IFNG, interferon gamma; TNF, tumor necrosis factor;

IL12A, interleukin 12A; IL12B, interleukin 12B; VEGFA, vascular endothelial growth factor A; TGFB1,

transforming growth factor beta 1; IL6, interleukin 6; IL10, interleukin 10; GZMB, granzyme B; PRF1,

perforin-1.
